# Supplementary material for: A Minimal Regulatory Network of Extrinsic and Intrinsic Factors Recovers Observed Patterns of CD4+ T Cell Differentiation and Plasticity
Source: PubMed Central journal article supplement (PMC4475012; doi:10.1371/journal.pcbi.1004324), 2015-06-19

# Th0 (No extrinsic signals)

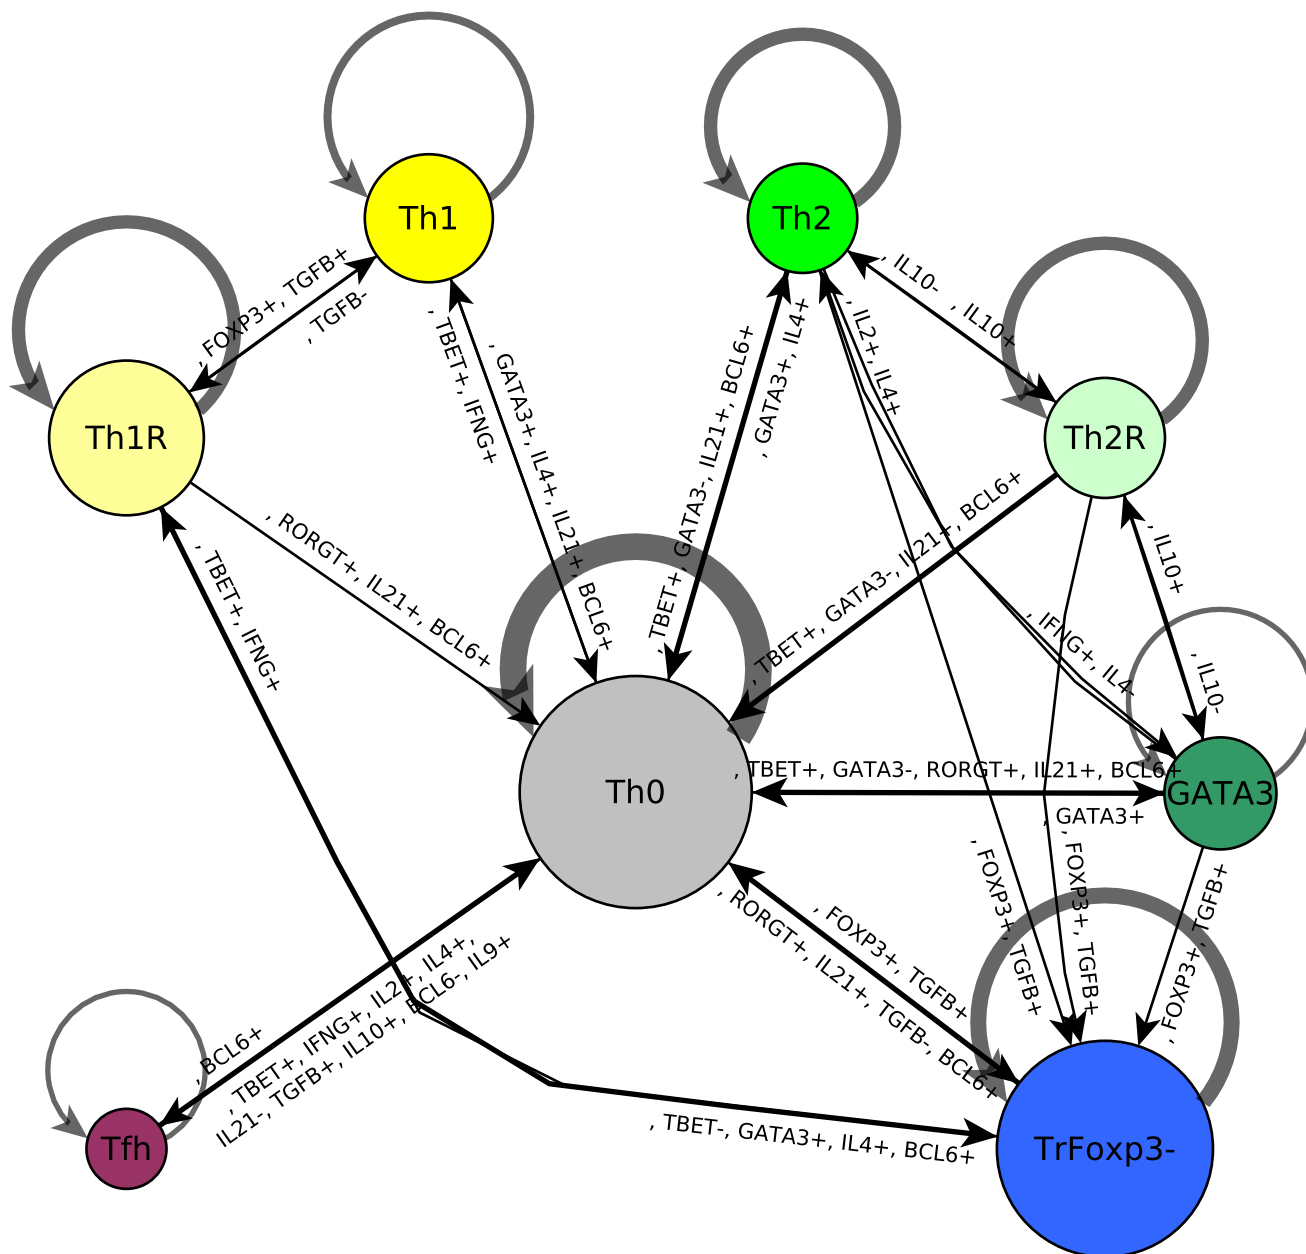

# Th1 (IFN $\gamma$ +)

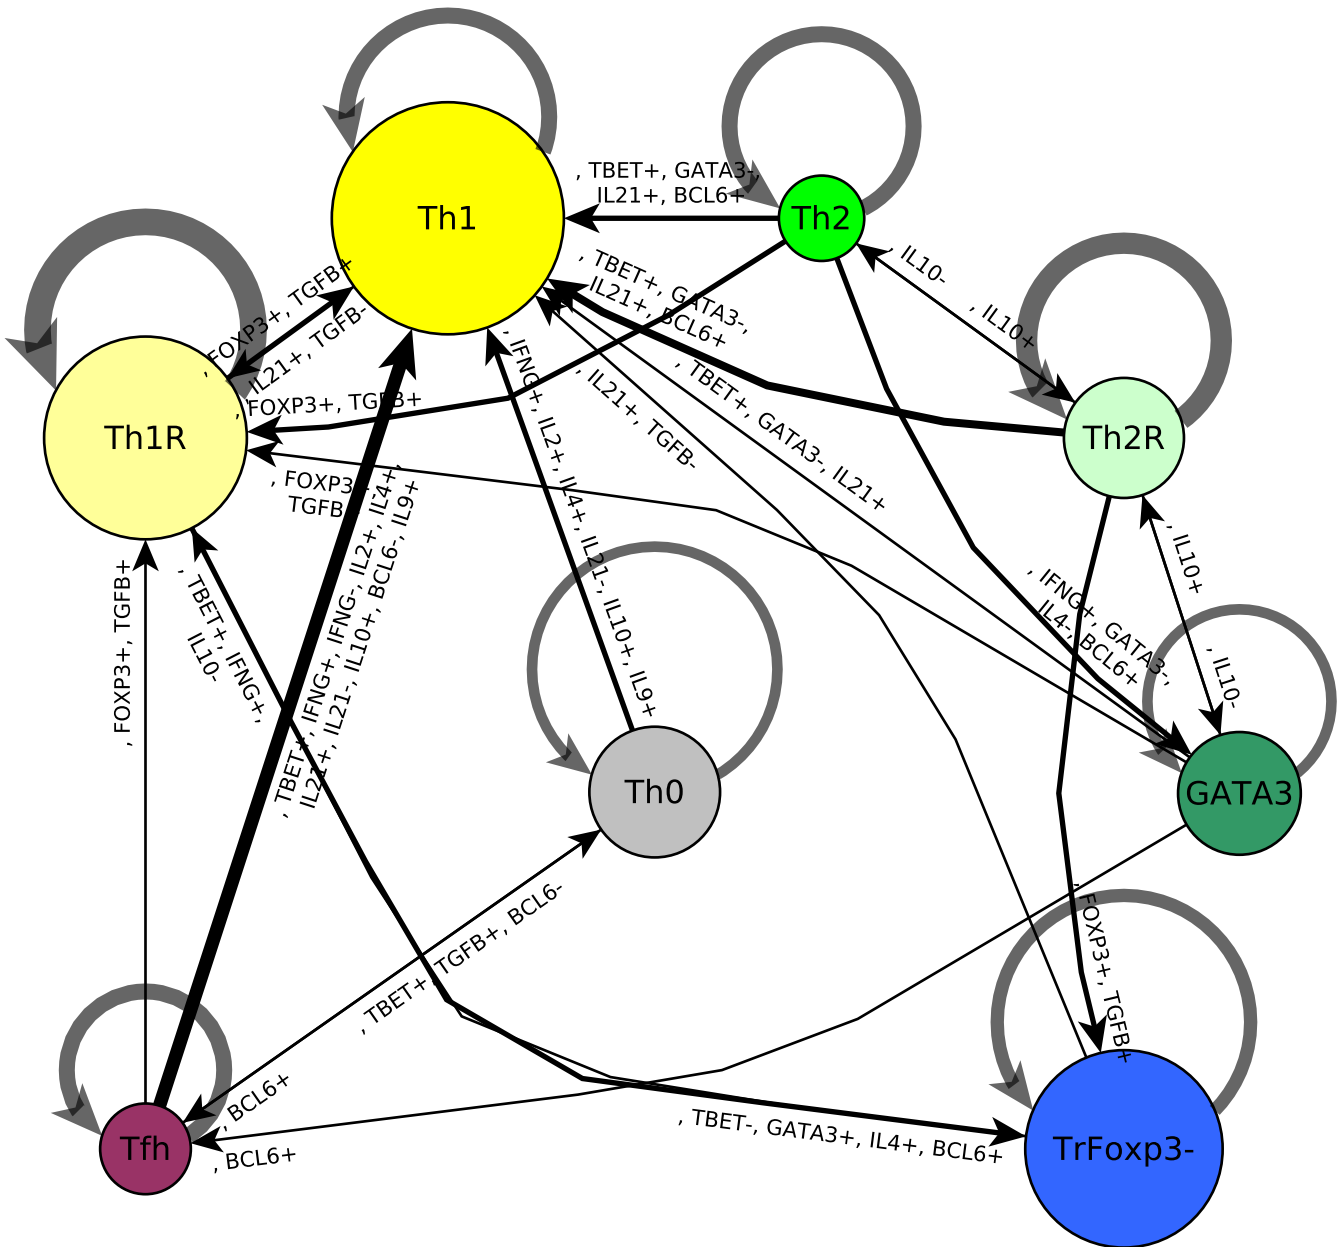

# Th2 (IL-4e+ and IL-2e+)

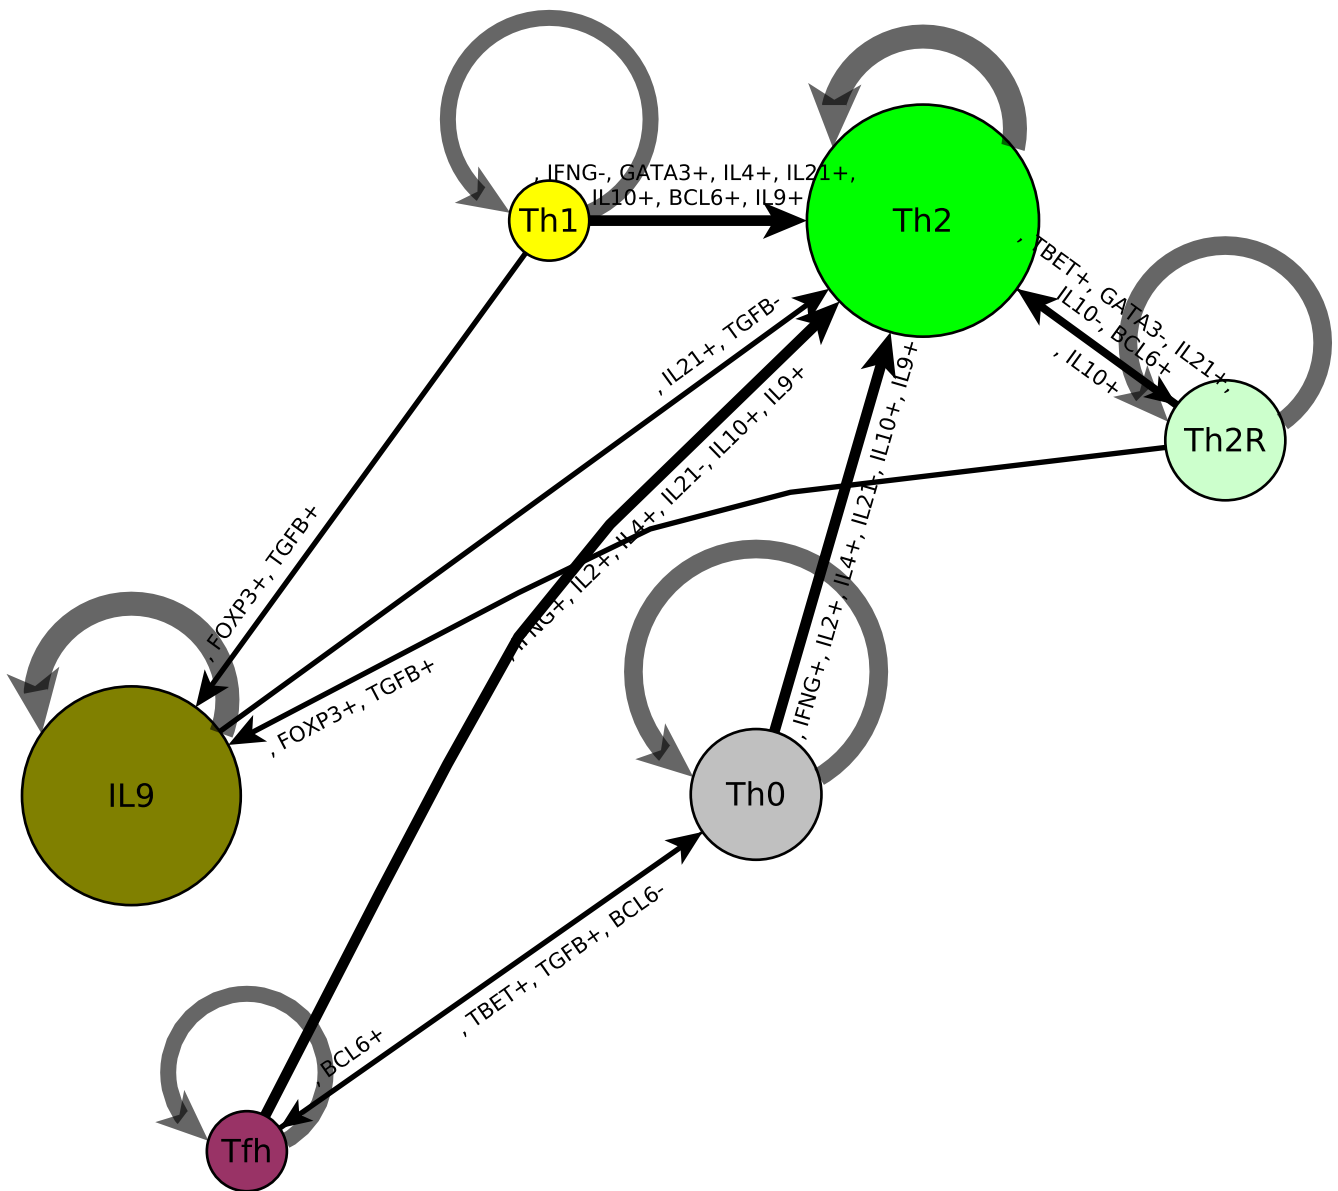

# Th17 (IL-21e+ and TGFβe+)

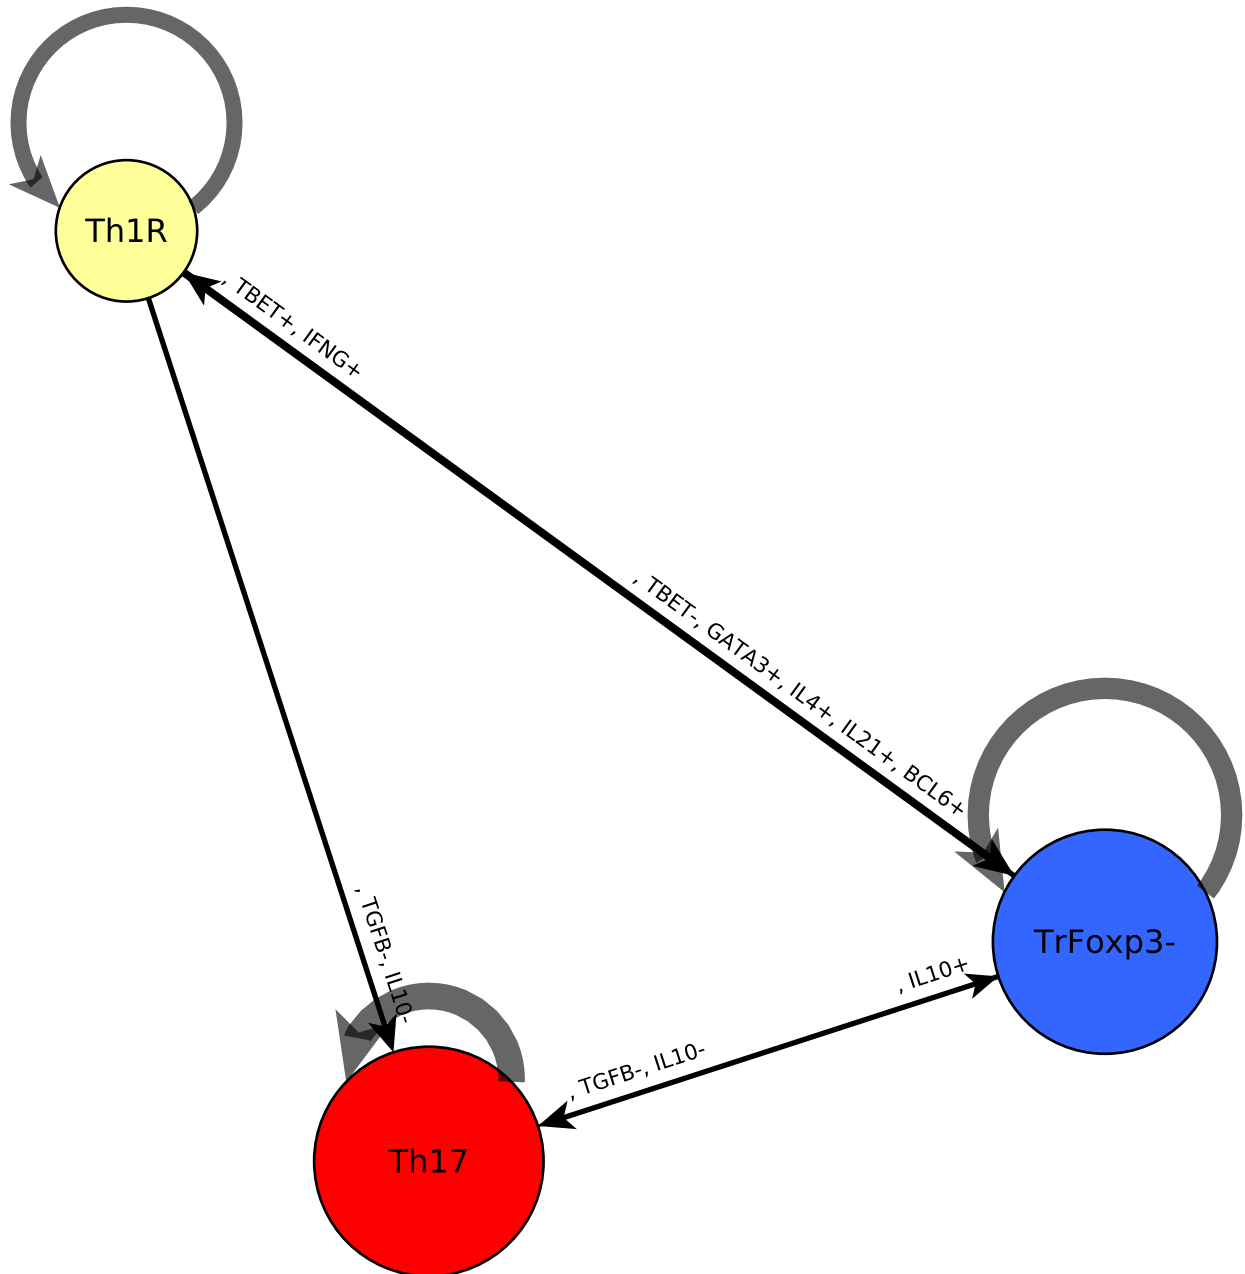

# iTreg (TGFβe+ and IL-2e+)

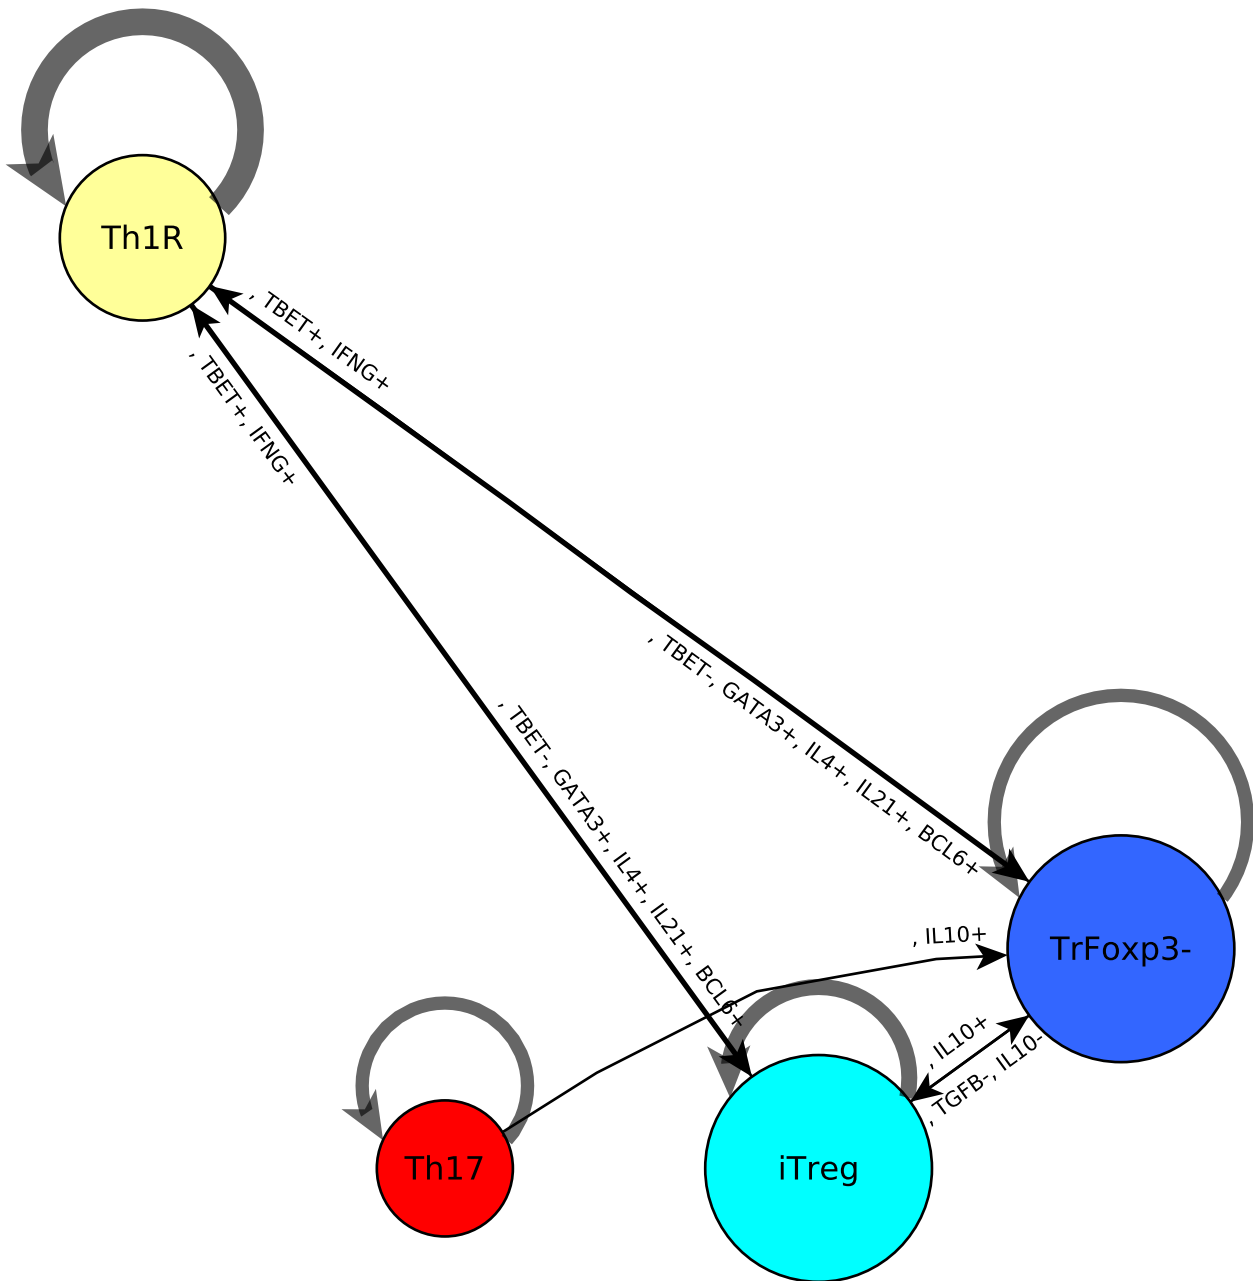

# IL-10 (IL-10<sub>e+</sub>)

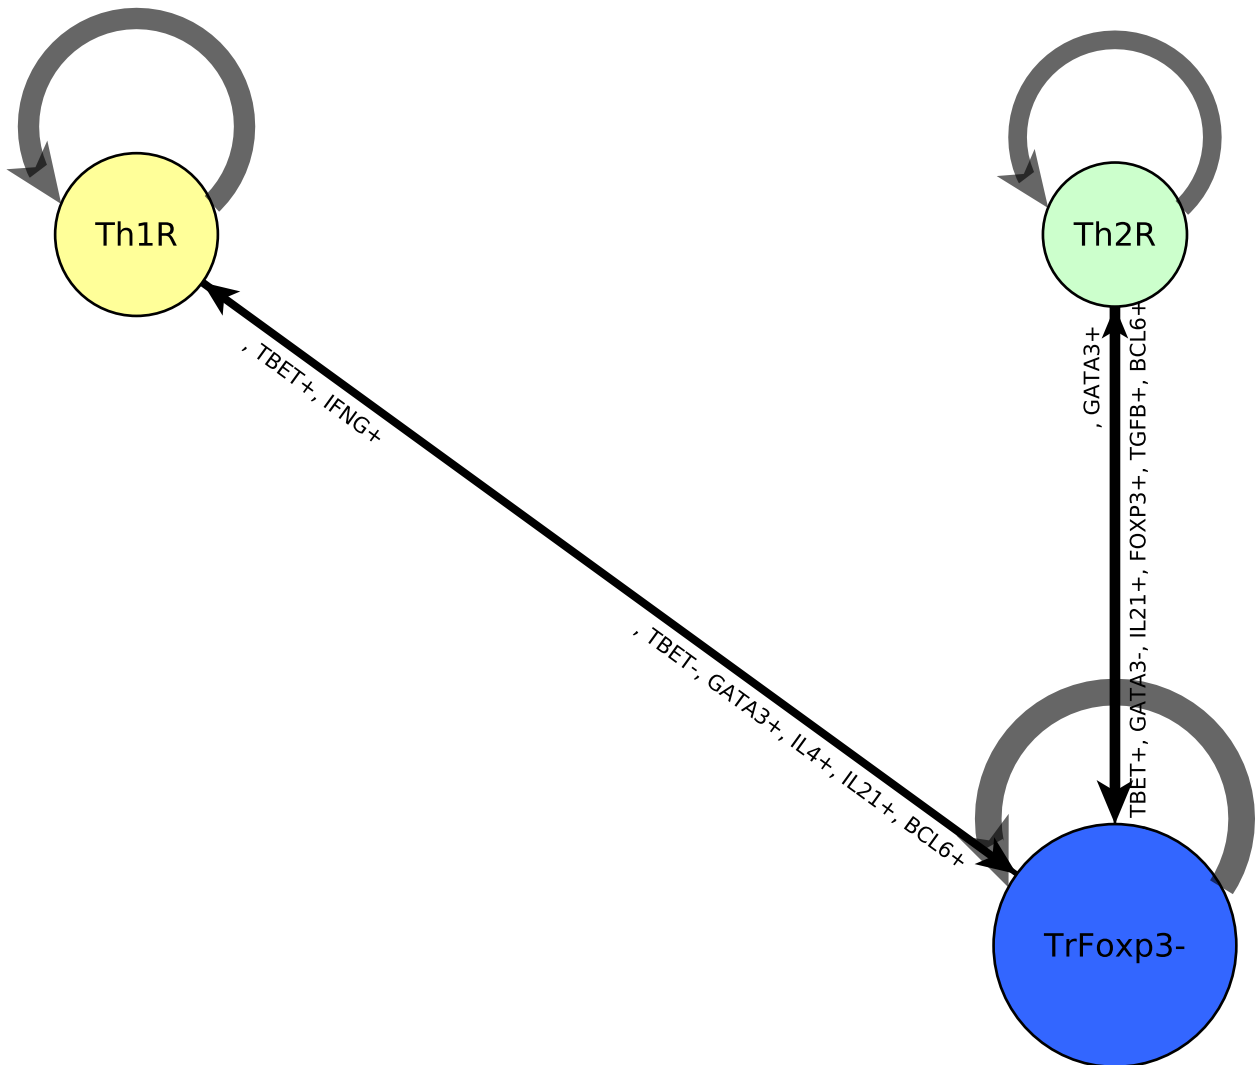

# Tfh (IL-21\_e+)

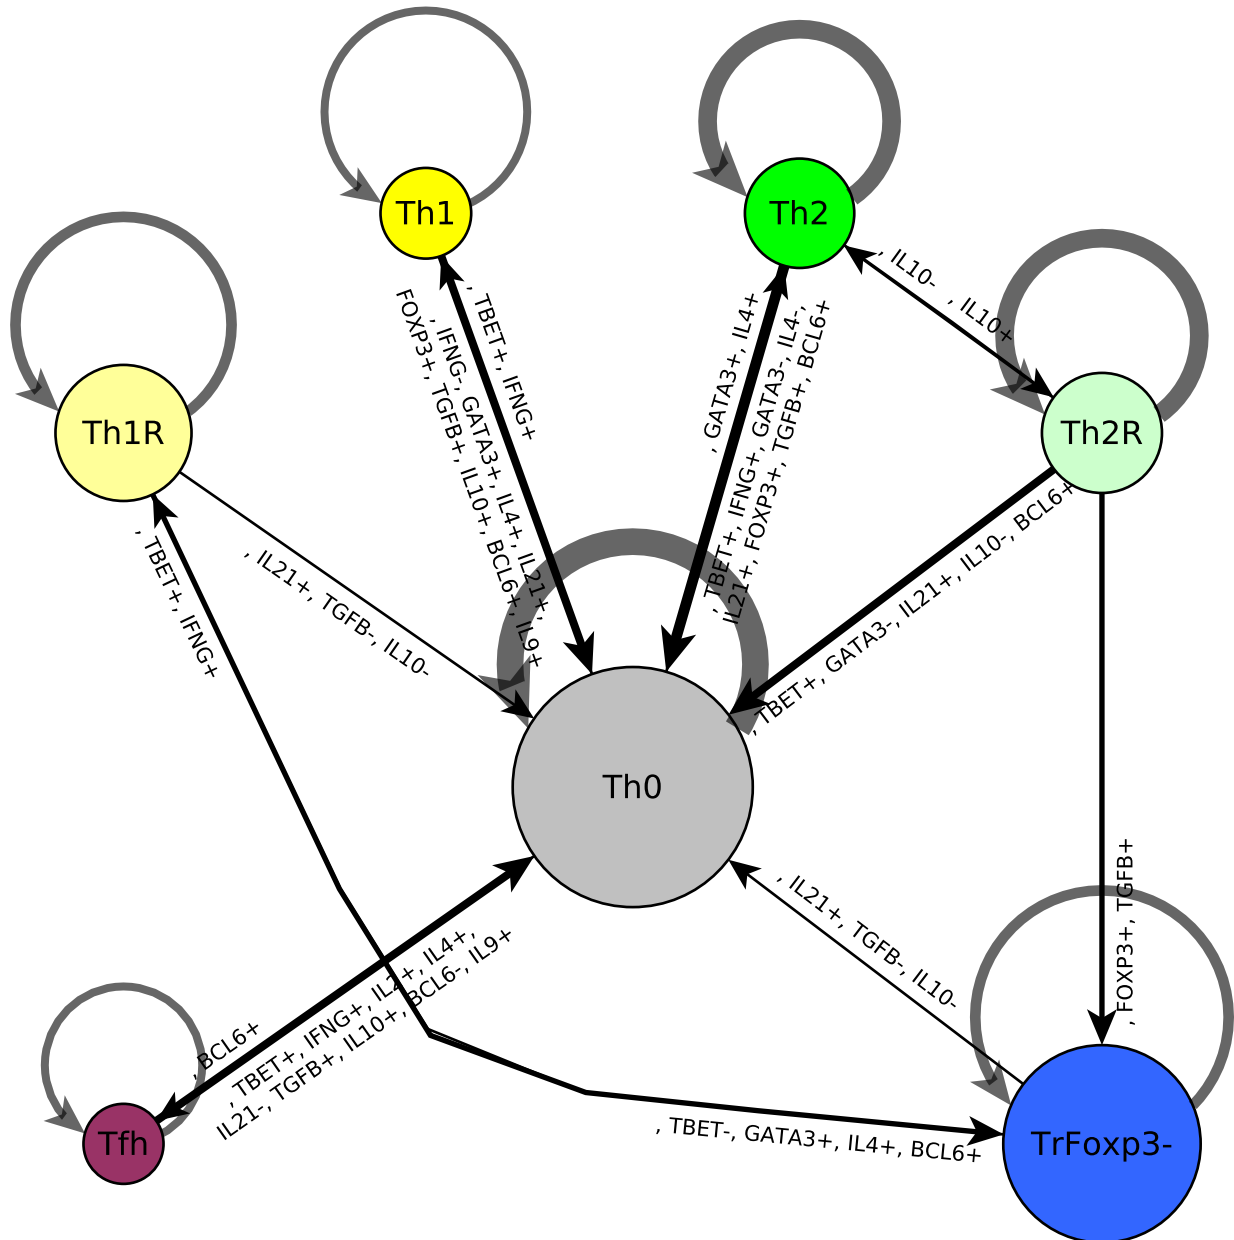



# IL-9 (IL-4<sub>e+</sub> and TGFβ<sub>e</sub>)

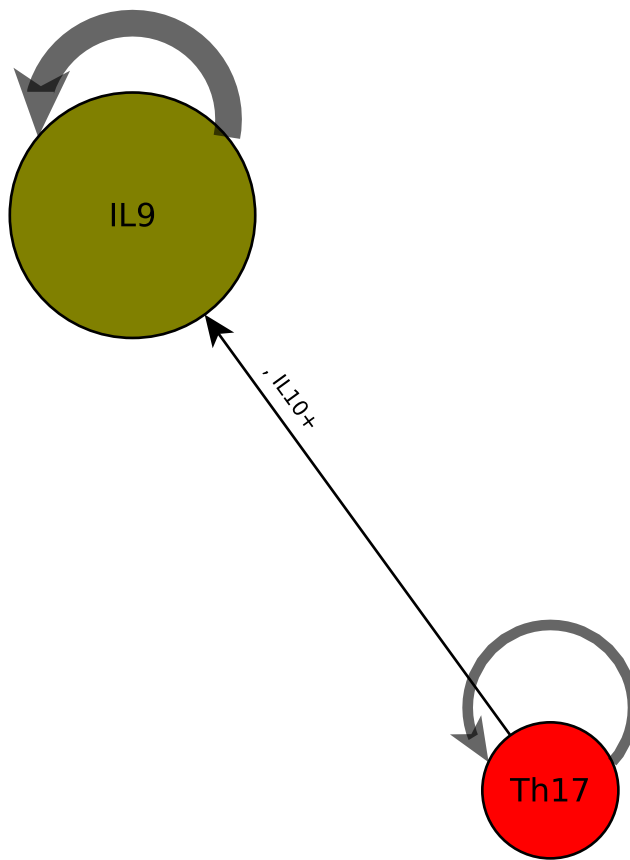

Supplement: pcbi.1004324.s006.pdf [file pcbi.1004324.s006.pdf]
